# Supplementary material for: Ontogenetic progression of individual head size in the larvae of the beetle Trypoxylus dichotomus (Coleoptera: Scarabaeidae): catch-up growth within stages and per-stage growth rate changes across stages
Source: PeerJ. 2023 May 31;11:e15451. doi: 10.7717/peerj.15451 (PMC10239228; doi:10.7717/peerj.15451)
Supplement: Supplemental Information 2 [file peerj-11-15451-s002.xlsx]

## Sheet: export
INDIVIDUAL	SEX	HW_L1_[mm]	HW_L2_[mm]	HW_L3_[mm]	BODYMASS_L1_Beginning_[mg]	BODYMASS_L2_Beginning_[mg]	BODYMASS_L3_Beginning_[mg]	BODYMASS_L3_End_[mg]
120001	FEMALE	3.1	5.65	10.9	40	524	3620	23321
120002	FEMALE	3.25	5.9	11.05	46	570	3749	26142
120005	FEMALE	3.25	6.05	11	48	562	3549	25984
120009	FEMALE	3.25	5.95	11.1	41	487	3492	21513
120011	FEMALE	3.05	5.45	10.5	42	479	3412	21492
120014	FEMALE	3.2	6.05	11.1	40	512	3972	28796
120019	FEMALE	3.1	5.85	10.75	41	484	3631	24833
120020	FEMALE	3.15	6.1	11.1	44	517	3619	22069
120024	FEMALE	2.9	5.55	10.35	34	393	3127	20740
120037	FEMALE	3	5.4	10.2	42	368	2963	21244
120038	FEMALE	2.8	5.4	10.5	32	403	3238	20406
120040	FEMALE	3.1	5.5	10.35	35	410	3193	21073
120043	FEMALE	3.25	5.85	10.35	32	415	3272	23504
120044	FEMALE	2.6	4.95	9.75	29	246	2289	18950
120048	FEMALE	3.2	5.6	10.6	31	404	3078	19902
120050	FEMALE	2.85	5.65	10.8	26	392	3213	21584
120053	FEMALE	3.2	5.8	10.8	31	437	3556	22725
120055	FEMALE	2.95	5.65	10.25	28	395	3114	19364
120056	FEMALE	2.8	5.6	10.65	33	410	3243	19307
120057	FEMALE	2.85	5.8	10.65	33	446	3282	20951
120059	FEMALE	2.95	5.95	10.75	32	431	3447	21945
120060	FEMALE	2.85	5.45	10.3	37	394	2942	22623
120062	FEMALE	3.2	6.05	11	35	496	3441	22296
120064	FEMALE	3.05	6.05	10.4	31	442	3358	23151
120069	FEMALE	2.95	5.35	10.35	36	391	2990	22027
120071	FEMALE	2.95	5.3	10.2	34	358	2895	22327
120072	FEMALE	2.95	5.4	10.1	36	388	2883	19186
120073	FEMALE	3.1	5.9	10.7	34	419	3158	23898
120074	FEMALE	3.15	5.6	10.75	31	410	3487	23757
120110	FEMALE	3.2	5.55	10.45	36	441	3325	21249
120122	FEMALE	3.1	5.8	10.9	39	427	3425	22786
120124	FEMALE	3	5.9	11.15	35	463	3515	22525
120131	FEMALE	2.95	5.9	10.9	33	424	3323	20254
120138	FEMALE	3.1	5.65	10.65	39	453	3293	21955
120139	FEMALE	3.1	5.9	11.2	39	467	3772	25024
120142	FEMALE	3.15	5.8	10.5	38	492	3548	22161
120159	FEMALE	2.85	5.5	10.4	33	391	3046	18847
120162	FEMALE	3	5.5	10.45	35	392	3143	19287
120192	FEMALE	2.55	5.35	10.2	45	342	2976	18129
120200	FEMALE	2.9	5.6	10.25	30	422	3098	22157
120205	FEMALE	2.7	5.6	10.35	31	440	3487	25779
120227	FEMALE	2.7	5.45	10.1	25	360	2769	21090
120230	FEMALE	2.7	5.55	10.75	28	428	3270	21441
120231	FEMALE	2.7	5.3	9.8	26	337	2727	18325
120233	FEMALE	2.65	5.4	10.25	27	332	2342	17552
120234	FEMALE	2.55	5.3	10.1	22	322	2611	20395
120235	FEMALE	2.5	5.15	9.85	23	283	2278	18382
120006	MALE	3.3	6.35	11.6	47	607	4689	36858
120007	MALE	3.25	6.2	11.55	45	597	4837	36833
120010	MALE	3.1	6	10.75	36	530	4123	29090
120012	MALE	3.3	6.1	10.4	52	526	4592	32161
120021	MALE	2.55	5.35	10.15	27	400	3525	28760
120022	MALE	2.65	5.6	10.8	32	408	3678	29579
120027	MALE	3.1	6	10.6	36	459	3737	28694
120028	MALE	3.15	5.9	10.9	36	497	3663	31705
120032	MALE	3	5.85	11.2	38	490	3855	31949
120033	MALE	2.7	5.7	11.1	36	420	3807	30983
120036	MALE	3.05	6.1	11.2	38	475	4186	31793
120041	MALE	3.1	5.75	11.2	32	441	3909	27142
120045	MALE	3.05	5.95	11.2	33	462	4071	29607
120047	MALE	2.85	6	11.25	35	476	4174	31980
120049	MALE	3.05	5.9	11.05	33	428	3671	29307
120051	MALE	2.9	5.45	11.1	26	393	4018	30922
120052	MALE	3.1	5.85	11.35	38	443	4002	31112
120058	MALE	2.85	5.4	11.1	33	420	3777	28263
120065	MALE	2.9	5.85	11.15	36	435	4006	32264
120066	MALE	3	6	11.2	32	434	4078	31098
120067	MALE	2.85	5.75	11.15	30	427	3764	29105
120068	MALE	3.15	5.95	10.9	38	465	3854	29918
120070	MALE	3.05	5.35	11	35	416	3647	31940
120076	MALE	3.2	6.1	11.4	37	504	3966	30409
120113	MALE	3.3	6.3	11.7	46	571	4988	38499
120117	MALE	3.4	6.2	11.7	47	585	4665	38464
120119	MALE	3.4	6.2	11.75	49	614	4994	42449
120121	MALE	3.25	6.15	11.95	40	522	4697	34064
120123	MALE	3.1	5.85	11.8	39	504	4765	34092
120129	MALE	3.25	6.05	11.2	44	556	4378	30905
120132	MALE	2.95	5.8	10.95	33	464	3839	30010
120133	MALE	3.15	5.55	11.1	32	427	3487	28661
120134	MALE	3	5.9	11.4	32	436	3982	30475
120135	MALE	2.95	5.95	11.2	35	447	3816	32005
120137	MALE	3.05	5.7	11.3	39	472	4336	31652
120140	MALE	3.1	5.9	11.65	42	517	4502	35379
120147	MALE	3.25	6.5	12.2	44	590	5036	34834
120149	MALE	3.15	6.1	11.75	40	450	4465	35540
120150	MALE	3	5.9	11.35	37	490	4345	32977
120152	MALE	2.9	5.55	10.8	33	422	3586	30336
120154	MALE	3.05	5.6	10.7	28	370	3562	27330
120155	MALE	3.1	5.95	11.2	30	421	4017	29109
120157	MALE	3.1	5.65	10.75	41	414	3858	29663
120201	MALE	2.9	5.65	10.75	31	404	3735	29068
120203	MALE	2.9	5.9	10.95	33	443	4153	35527
120207	MALE	2.9	5.75	11.1	34	444	3733	28029
120212	MALE	3	5.75	11.05	32	392	3310	26574
120223	MALE	2.7	5.65	10.65	25	400	3273	28211
120225	MALE	2.55	5.5	10.75	33	375	3311	29125
120226	MALE	2.7	5.65	10.7	25	377	3258	28226
120229	MALE	2.55	5.4	10.55	23	396	3462	29279
